# Supplementary material for: Long-term use of secondary prevention medications for heart failure in Western Australia: a protocol for a population-based cohort study
Source: PubMed Central journal article supplement — BMJ Open. 2016 Nov 1;6(11):e014397. doi: 10.1136/bmjopen-2016-014397 (PMC5128762; doi:10.1136/bmjopen-2016-014397), 2016-11-01
Supplement: bmjopen-2016-014397supp_tables.pdf [file bmjopen-2016-014397supp_tables.pdf]

# Long-term use of secondary prevention medications for heart failure in Western Australia: a study protocol

## Supplementary Tables

**Supplementary Table 1: ICD codes of diseases and procedures of relevance in the study**

| Diseases                              | ICD-9 and ICD-9-CM                                                                                                                                                                                                                                                                                                                                                             | ICD-10-AM                                                                                                                   |
|---------------------------------------|--------------------------------------------------------------------------------------------------------------------------------------------------------------------------------------------------------------------------------------------------------------------------------------------------------------------------------------------------------------------------------|-----------------------------------------------------------------------------------------------------------------------------|
| <b>Diseases excluded from cohort</b>  |                                                                                                                                                                                                                                                                                                                                                                                |                                                                                                                             |
| Valvular heart disease                | 394-398, 424                                                                                                                                                                                                                                                                                                                                                                   | I05-I09, I34-I39, Z95.2-4                                                                                                   |
| Dialysis diagnosis codes              | V45.1, V56, 996.1, 996.73                                                                                                                                                                                                                                                                                                                                                      | Z49, Z99.2, T82.4                                                                                                           |
| Dialysis procedure codes              | 54.90, 39.27, 38.95, 39.42, 39.43, 8-853, 8-860                                                                                                                                                                                                                                                                                                                                | 13112-00, 13104-00, 13109-00, 13110-00, 90353-00, 90351-00, 13106-00, 13109-01, 90352-00, 90353-01                          |
| <b>Comorbidities</b>                  |                                                                                                                                                                                                                                                                                                                                                                                |                                                                                                                             |
| Ischemic heart disease                | 410-414                                                                                                                                                                                                                                                                                                                                                                        | I20-I25                                                                                                                     |
| Hypertension                          | 401-405                                                                                                                                                                                                                                                                                                                                                                        | I10-I15                                                                                                                     |
| Atrial Fibrillation                   | 427.31                                                                                                                                                                                                                                                                                                                                                                         | I48                                                                                                                         |
| Diabetes mellitus                     | 250                                                                                                                                                                                                                                                                                                                                                                            | E10-E14                                                                                                                     |
| Chronic obstructive pulmonary disease | 490-494, 496                                                                                                                                                                                                                                                                                                                                                                   | J40-J47                                                                                                                     |
| Peripheral vascular disease           | 440-442, 443.1, 443.9, 444, 447.1                                                                                                                                                                                                                                                                                                                                              | I70-I72, I73.1, I73.9, I74, I77.1                                                                                           |
| Stroke                                | 430, 431, 433, 434, 436                                                                                                                                                                                                                                                                                                                                                        | I60, I61, I63, I64                                                                                                          |
| Chronic kidney disease                | 250.40-43, 405.01-02, 405.11-12, 405.91, 405.92, 580.0, 580.4, 580.89, 580.9, 581.9, 581.89, 582.0-2, 582.4, 582.81, 582.89, 583.0-2, 583.4, 583.6-7, 583.9, 583.89, 583.81, 587, 588.0-1, 588.8-9, 589.0-1, 589.9, 590.00-01, 590.80-81, 590.9, 590.2-3, 593.0-2, 593.6, 593.9, 593.81-82, 593.89, 599.7, 753.0, 753.2-4, 753.10-17, 753.19, 966.1, 966.81, V42, V56.0, V56.8 | E10.2, E11.2, E12.2, E13.2, E14.2, I15.0-1, N00-02, N04-08, N11-12, N14-16, N25-28, T82.4, T86.1, Q60-63, Z94.0, Z99.2, Z49 |
| Renal failure                         | 585.1, 585.9, 403.01, 403.11, 403.91, 404.02-03, 404.12-13, 404.92-93, 586,                                                                                                                                                                                                                                                                                                    | I12.0, I13.1-2, N17-19                                                                                                      |

ICD-9, ICD-9-CM: International Classification of Diseases Ninth Revision, and the Clinical Modification (CM); ICD-10-AM: International Statistical Classification of Diseases and Related Health Problems, Tenth Revision, Australian Modification.

**Supplementary Table 2:** Strengths and limitations of the common methods for measuring adherence and persistence from electronic pharmacy claims datasets

| Types of measurement              | Description of calculations                                                                                                                                           | Strengths                                                                                                                                                                                                                                                                                                                                                     | Limitations                                                                                                                                                                                                                                                                                                                                                                                                                                 |
|-----------------------------------|-----------------------------------------------------------------------------------------------------------------------------------------------------------------------|---------------------------------------------------------------------------------------------------------------------------------------------------------------------------------------------------------------------------------------------------------------------------------------------------------------------------------------------------------------|---------------------------------------------------------------------------------------------------------------------------------------------------------------------------------------------------------------------------------------------------------------------------------------------------------------------------------------------------------------------------------------------------------------------------------------------|
| Medication Possession Ratio (MPR) | Ratio of total days supply to days in study period                                                                                                                    | <ul style="list-style-type: none"> <li>• Can be presented as categorical or continuous variable</li> <li>• Ease of calculation and interpretation<sup>1</sup></li> <li>• Can be averaged across study patients to estimate the overall adherence in the cohort<sup>2</sup></li> <li>• Similar to PDC when estimating for a single drug<sup>3</sup></li> </ul> | <ul style="list-style-type: none"> <li>• Can be confusing (eg. estimate can be &gt;100% which is difficult to interpret)</li> <li>• Period of under- or over-supply may be obscured<sup>3</sup></li> <li>• Switching of medications in same drug class will inflate MPR<sup>4</sup></li> <li>• Patients taking concurrent medications from within the same class during measurement period will inflate the estimate<sup>4</sup></li> </ul> |
| Proportion of Days Covered (PDC)  | $\frac{\text{Total days supply}}{\text{Number of days between the first fill of the medication during the measurement period and the end of the measurement period}}$ | <ul style="list-style-type: none"> <li>• Can create a time array to determine how many days in the denominator were covered by at least 1 drug<sup>3</sup></li> <li>• More conservative estimate when patient switches<sup>3</sup> medications within the same drug class</li> <li>• Used widely in health research</li> <li>• Value capped at 1</li> </ul>   | <ul style="list-style-type: none"> <li>• Does not permit carryover of excess medication supply from one interval to another<sup>3</sup></li> <li>• Ignores non-adherent time after the last refill<sup>1</sup></li> </ul>                                                                                                                                                                                                                   |
| Refill-sequence model             | Patient has refilled a prescription within a predetermined number of days                                                                                             | <ul style="list-style-type: none"> <li>• Widely used in health settings<sup>5 6</sup></li> </ul>                                                                                                                                                                                                                                                              | <ul style="list-style-type: none"> <li>• May not consider refill behaviour across the observation period</li> <li>• Once decided that drug has stopped, further refilling is no longer allowed</li> <li>• Predetermined gap is hard to define</li> </ul>                                                                                                                                                                                    |

## REFERENCES

1. Peterson AM, Nau DP, Cramer JA, Benner J, Gwadry-Sridhar F, Nichol M. A checklist for medication compliance and persistence studies using retrospective databases. *Value Health* 2007;10:3-12.
2. Karve S, Cleves MA, Helm M, Hudson TJ, West DS, Martin BC. An empirical basis for standardizing adherence measures derived from administrative claims data among diabetic patients. *Med Care* 2008;46:1125-33.
3. Nau DP. Proportion of days covered (PDC) as a preferred method of measuring medication adherence. *Springfield, VA: Pharmacy Quality Alliance* 2012.
4. Hess LM, Raebel MA, Conner DA, Malone DC. Measurement of adherence in pharmacy administrative databases: a proposal for standard definitions and preferred measures. *Ann Pharmacother* 2006;40:1280-88.
5. Gislason GH, Rasmussen JN, Abildstrom SZ, et al. Persistent use of evidence-based pharmacotherapy in heart failure is associated with improved outcomes. *Circulation* 2007;116:737-44.
6. Gislason GH, Buch P, Friberg J, et al. Long-term compliance with beta-blockers, angiotensin-converting enzyme inhibitors, and statins after acute myocardial infarction. *Eur Heart J* 2006;27:1153-58.
